# Supplementary material
Source: MDPI journal article supplement (https://www.mdpi.com/2077-0472/13/10/1909)
Supplement: s1 [file s1]

Supplementary:

|                |                                                                |     |
|----------------|----------------------------------------------------------------|-----|
| XM_031464240.1 | TGCGAGGAGGAGTTGTCAGCTTCGCCAACCAGCTGCAGGCTCTGGGGCTGAAGCTGCGG    | 60  |
| H              | TGCGAGGAGGAGTTGTCAGCTTCGCCAACCAGCTGCAGGCTCTGGGGCTGAAGCTGCGG    | 60  |
| M              | TGCGAGGAGGAGTTGTCAGCTTCGCCAACCAGCTGCAGGCTCTGGGGCTGAAGCTGCGG    | 60  |
|                | *****                                                          |     |
| XM_031464240.1 | GAGGTGCCGGGGGACGGCAATTGCCTATTTCAGAGCTCTTGGTGATCAATTGGAGGGACAT  | 120 |
| H              | GAGGTGCCGGGGGACGGCAATTGCCTATTTCAGAGCTCTTGGTGATCAATTGGAGGGACAC  | 120 |
| M              | GAGGTGCCGGGGGACGGCAATTGCCTATTTCAGAGCTCTTGGTGATCAATTGGAGGGACAT  | 120 |
|                | *****                                                          |     |
| XM_031464240.1 | TCAAGAAATCATCTCAAGCACCGACAGGAGACAGTGGACTACATGATAAAGCAGCGGGAA   | 180 |
| H              | TCAAGAAATCATCTCAAGCACCGACAGGAGACAGTGGACTACATGATAAAGCAGCGGGAA   | 180 |
| M              | TCAAGAAATCATCTCAAGCACCGACAGGAGACAGTGGACTACATGATAAAGCAGCGGGAA   | 180 |
|                | *****                                                          |     |
| XM_031464240.1 | GATTTTGAACCCCTTTGTAGAAGATGACGTTCCCTTTTGAGAAACATGTGGCCAGTTTGGCA | 240 |
| H              | GATTTTGAACCCCTTTGTAGAAGATGACGTTCCCTTTTGAGAAACATGTGGCCAGTTTGGCA | 240 |
| M              | GATTTTGAACCCCTTTGTAGAAGATGACGTTCCCTTTTGAGAAACATGTGGCCAGTTTGGCA | 240 |
|                | *****                                                          |     |
| XM_031464240.1 | AAGCCTGGAACATTTGCTGGCAATGATGCTATTGTAGCCTTTGCAAGAAATCATCAGTTG   | 300 |
| H              | AAGCCTGGAACATTTGCTGGCAATGATGCTATTGTAGCCTTTGCAAGAAATCATCAGTTG   | 300 |
| M              | AAGCCTGGAACATTTGCTGGCAATGATGCTATTGTAGCCTTTGCAAGAAATCATCAGTTG   | 300 |
|                | *****                                                          |     |
| XM_031464240.1 | AATGTGGTGATTTCATCAACTTAATGCCCTTTGTGGCAGATCCGCGGTACAGAGAAGAGC   | 360 |
| H              | AATGTGGTGATTTCATCAACTTAATGCCCTTTGTGGCAGATCCGCGGTACAGAGAAGAGC   | 360 |
| M              | AATGTGGTGATTTCATCAACTTAATGCCCTTTGTGGCAGATCCGCGGTACAGAGAAGAGC   | 360 |
|                | *****                                                          |     |
| XM_031464240.1 | AACGTGCGGGAGTTGCACATCGCGTACCGGTGTGGCGAGCACTATGACAGCGTCCGGAGG   | 420 |
| H              | AACGTGCGGGAGTTGCACATCGCGTACCGGTGTGGCGAGCACTATGACAGCGTCCGGAGG   | 420 |
| M              | AACGTGCGGGAGTTGCACATCGCGTACCGGTGTGGCGAGCACTATGACAGCGTCCGGAGG   | 420 |
|                | *****                                                          |     |
| XM_031464240.1 | ATCAACGACAACTCGGAAGCACCTGCGCACCT                               | 452 |
| H              | ATCAACGACAACTCGGAAGCACCTGCGCACCT                               | 452 |
| M              | ATCAACGACAACTCGGAAGCACCTGCGCACCT                               | 452 |
|                | *****                                                          |     |

**Figure S1.** Analysis of nitrogenous bases matching for DNA in healthy and mastitis affected camels using GenBank gb|XM\_031464240.1| and *OTUD3* marker (452-bp) sequences.

```

MW557315.1 TCAGGCCCATTCTCTGTCTTGTGACCCCACTGGCGTCTGTGATGGCCGTGCCAGATCTTT 60
H TCAGGCCCATTCTCTGTCTTGTGACCCCACTGGCGTCTGTGATGGCCGTGCCAGATCTTT 60
M TCAGGCCCATTCTCTGTCTTGTGACCCCACTGGCGTCTGTGATGGCCGTGCCAGATCTTT 60
*****

MW557315.1 AAACGCCATCCCCCAGGGCTCACGGCAGCTGTGAAAAGCCTTGACCTGTCCGATAACAA 120
H AAACGCCATCCCCCAGGGCTCACGGCAGCTGTGAAAAGCCTTGACCTGTCCGATAACAA 120
M AAACGCCATCCCCCAGGGCTCACGGCAGCTGTGAAAAGCCTTGACCTGTCCAATAACAA 120
*****

MW557315.1 GATCACCTATGTCGGCAACAATGACCTGCAGAGGTGTGTGGGCCTCAAGGCCTTGAGGCT 180
H GATCACCTATGTCGGCAACAATGACCTGCAGAGGTGTGTGGGCCTCAAGGCCTTGAGGCT 180
M GATCACCTATGTCGGCAACAATGACCTGCAGAGGTGTGTGGGCCTCAAGGCCTTGAGGCT 180
*****

MW557315.1 GGGGTCCAATGGAGTCCACACAATAGAGGAAGATTCCCTTTTTTCCCCTGAGGAGCCTCGA 240
H GGGGTCCAATGGAGTCCACACAATAGAGGAAGATTCCCTTTTTTCCCCTGAGGAGCCTCGA 240
M GGGGTCCAATGGAGTCCACACAATAGAGGAAGATTCCCTTTTTTCCCCTGAGGAGCCTCGA 240
*****

MW557315.1 ACATTTGGACTTATCCTATAATCGCTTGCTAACTTATCACCTTCCTGGTTCAGGACCCT 300
H ACATTTGGACTTATCCTATAATCGCTTGCTAACTTATCACCTTCCTGGTTCAGGACCCT 300
M ACATTTGGACTTATCCTATAATCGCTTGCTAACTTATCACCTTCCTGGTTCAGGACCCT 300
*****

MW557315.1 TTCTGCCTTGAAATTCTTAACTTGCTGGGAAATCCTTACAGAACACTTGGCGAAACGTC 360
H TTCTGCCTTGAAATTCTTAACTTGCTGGGAAATCCTTACAGAACACTTGGCGAAACGTC 360
M TTCTGCCTTGAAATTCTTAACTTGCTGGGAAATCCTTACAGAACACTTGGCGAAACGTC 360
*****

MW557315.1 TCTTTTTTCTCATCTCCCCAATCTGCGAATTCTGAAAGTAGGAAATAGTAACCCCTTCTC 420
H TCTTTTTTCTCATCTCCCCAATCTGCGAATTCTGAAAGTAGGAAATAGTAACCCCTTCTC 420
M TCTTTTTTCTCATCTCCCCAATCTGCGAATTCTGAAAGTAGGAAATAGTAACCCCTTCTC 420
*****

MW557315.1 CGAGATTGAGGAAAAGGATTTCTCTGGGCTCACTTTTCTTGAGGAACCTGAGATCGATGC 480
H CGAGATTGAGGAAAAGGATTTCTCTGGGCTCACTTTTCTTGAGGAACCTGAGATCGATGC 480
M CGAGATTGAGGAAAAGGATTTCTCTGGGCTCACTTTTCTTGAGGAACCTGAGATCGATGC 480
*****

MW557315.1 TTCAAATCTGCAGAGGTATGAGCCAAAGAGTTTGAGGTCAATTCAGAACATCACTCATCT 540
H TTCAAATCTGCAGAGGTATGAGCCAAAGAGTTTGAGGTCAATTCAGAACATCACTCATCT 540
M TTCAAATCTGCAGAGGTATGAGCCAAAGAGTTTGAGGTCAATTCAGAACATCACTCATCT 540
*****

```

**Figure S2.** Analysis of nitrogenous bases matching for DNA in healthy and mastitis affected camels using GenBank gb|MW557315.1| and *TLR2* marker (540-bp) sequences.

|                |                                                              |     |
|----------------|--------------------------------------------------------------|-----|
| XM_010998333.2 | TAGCTGTGGCTCTGATGACAGCCATGGCCTTTCTCTCCTGTCTGAGATCCGAGAGCTGGG | 60  |
| H              | TAGCTGTGGCTCTGATGACAGCCATGGCCTTTCTCTCCTGTCTGAGATCCGAGAGCTGGG | 60  |
| M              | TAGCTGTGGCTCTGATGACAGCCATGGCCTTTCTCTCCTGTCTGAGATCCGAGAGCTGGG | 60  |
|                | *****                                                        |     |
| XM_010998333.2 | AACCCTGTGTGCAGGTGGTTCCTAACATTAGTTACCAATGCATGGAGCTGAATCTCTACA | 120 |
| H              | AACCCTGTGTGCAGGTGGTTCCTAACATTAGTTACCAATGCATGGAGCTGAATCTCTACA | 120 |
| M              | AACCCTGTGTGCAGGTGGTTCCTAACATTAGTTACCAATGCATGGAGCTGAATCTCTACA | 120 |
|                | *****                                                        |     |
| XM_010998333.2 | AAGTCCCAGACAACATCCCCACATCGACCAAGATACTGGATCTCAGCTTTAACCACCTGA | 180 |
| H              | AAGTCCCAGACAACATCCCCACATCGACCAAGATACTGGATCTCAGCTTTAACCACCTGA | 180 |
| M              | AAGTCCCAGACAACATCCCCACATCGACCAAGATACTGGATCTCAGCTTTAACCACCTGA | 180 |
|                | *****                                                        |     |
| XM_010998333.2 | ATCATTTAGGCAGCCATAGCTTCTCCAGCTTCCAGAACTGCAGGTGCTGGATTTATCCA  | 240 |
| H              | ATCATTTAGGCAGCCATAGCTTCTCCAGCTTCCAGAACTGCAGGTGCTGGATTTATCCA  | 240 |
| M              | ATCATTTAGGCAGCCATAGCTTCTCCAGGTTCAGAACTGCAGGTGCTGGATTTATCCA   | 240 |
|                | *****                                                        |     |
| XM_010998333.2 | GATGTGAAATTGAGATGATTGACGATAATGCGTATCAGGGGCTAAACCACCTTGCCACCT | 300 |
| H              | GATGTGAAATTGAGATGATTGACGATAATGCGTATCAGGGGCTAAACCACCTTGCCACCT | 300 |
| M              | GATGTGAAATTGAGATGATTGACGATAATGCGTATCAGGGGCTAAACCACCTTGCCACCT | 300 |
|                | *****                                                        |     |
| XM_010998333.2 | TGATATTGACGGGAAACCCTATCCAGAGTTTAGCCCTGAGAGCCTTTTCTGGAATACCGA | 360 |
| H              | TGATATTGACGGGAAACCCTATCCAGAGTTTAGCCCTGAGAGCCTTTTCTGGAATACCGA | 360 |
| M              | TGATATTGACGGGAAACCCTATCCAGAGTTTAGCCCTGAGAGCCTTTTCTGGAATACCGA | 360 |
|                | *****                                                        |     |
| XM_010998333.2 | GTTTACAGAAGCTGGTTGCTGTGGAGACAAACCTAGCATCTCTAG 405            |     |
| H              | GTTTACAGAAGCTGGTTGCTGTGGAGACAAACCTAGCATCTCTAG 405            |     |
| M              | GTTTACAGAAGCTGGTTGCTGTGGAGACAAACCTAGCATCTCTAG 405            |     |
|                | *****                                                        |     |

**Figure S3.** Analysis of nitrogenous bases matching for DNA in healthy and mastitis affected camels using GenBank gb|XM\_010998333.2| and *TLR4* marker (405-bp) sequences.

|                |                                                               |     |
|----------------|---------------------------------------------------------------|-----|
| XM_031462916.1 | GACTGAGTGCCCAATCCTGCTCACTCAACTTTGGAATTAAGTGCCCAGATGGTTACACCAA | 60  |
| H              | GACTGAGTGCCCAATCCTGCTCACTCAACTTTGGAATTAAGTGCCCAGATGGTTACACCAA | 60  |
| M              | GACTGAGTGCCCAATCCTGCTCACTCAACTTTGGAATTAAGTGCCCAGATGGTTACACCAA | 60  |
|                | *****                                                         |     |
| XM_031462916.1 | GATTACCAATGGCACCCTAGGGATCCGAGACTGCAGGTACACCTTTGAGGTAAGAACATA  | 120 |
| H              | GATTACCAATGGCACCCTAGGGATCCGAGACTGCAGGTACACCTTTGAGGTAAGAACATA  | 120 |
| M              | GATTACCAATGGCACCCTAGGGATCCGAGACTGCAGGTACACCTTTGAGGTCAGAACATA  | 120 |
|                | *****                                                         |     |
| XM_031462916.1 | CTCGCTGTCTCTCCCTGGATGCCGCCATATCTGCAGGAAGGACTATCTCCAGCCTCAGTG  | 180 |
| H              | CTCGCTGTCTCTCCCTGGATGCCGCCATATCTGCAGGAAGGACTATCTCCAGCCTCAGTG  | 180 |
| M              | CTCGCTGTCTCTCCCTGGATGCCGCCATATCTGCAGGAAGGACTATCTCCAGCCTCAGTG  | 180 |
|                | *****                                                         |     |
| XM_031462916.1 | CTGTCCCGGCTACTGGGGCCCAGACTGCATGGAGTGCCCCGGAGGAGCGAGGTCCCCCTG  | 240 |
| H              | CTGTCCCGGCTACTGGGGCCCAGACTGCATGGAGTGCCCCGGAGGAGCGAGGTCCCCCTG  | 240 |
| M              | CTGTCCCGGCTACTGGGGCCCAGACTGCATGGAGTGCCCCGGAGGAGCGAGGTCCCCCTG  | 240 |
|                | *****                                                         |     |
| XM_031462916.1 | CAGCGGCAGGGGCAGTTGTGCTGAAGGCATGGATGGAAACGGAAGCTGCTCCTGCCAAGA  | 300 |
| H              | CAGCGGCAGGGGCAGTTGTGCTGAAGGCATGGATGGAAACGGAAGCTGCTCCTGCCAAGA  | 300 |
| M              | CAGCGGCAGGGGCAGTTGTGCTGAAGGCATGGATGGAAACGGAAGCTGCTCCTGCCAAGA  | 300 |
|                | *****                                                         |     |
| XM_031462916.1 | GGGGTTTGGTGAACAGCCTGTGAAGCCTGTGCTGATGACAACCTTATTTGGACCCAGCTG  | 360 |
| H              | GGGGTTTGGTGAACAGCCTGTGAAGCCTGTGCTGATGACAACCTTATTTGGACCCAGCTG  | 360 |
| M              | GGGGTTTGGTGAACAGCCTGTGAAGCCTGTGCTGATGACAACCTTATTTGGACCCAGCTG  | 360 |
|                | *****                                                         |     |
| XM_031462916.1 | TTCAGCAGTGTGCACCTGTGTGCATGGCGTGTGCCGAGTGGAATTGATGGTGACGGGAC   | 420 |
| H              | TTCAGCAGTGTGCACCTGTGTGCATGGCGTGTGCCGAGTGGAATTGATGGTGACGGGAC   | 420 |
| M              | TTCAGCAGTGTGCACCTGTGTGCATGGCGTGTGCCGAGTGGAATTGATGGTGACGGGAC   | 420 |
|                | *****                                                         |     |
| XM_031462916.1 | CTGTGAGTGCTACTCTGCATACACCGGCCCAATTGTGACAAACCCATCCCTGAATGTGC   | 480 |
| H              | CTGTGAGTGCTACTCTGCATACACCGGCCCAATTGTGACAAACCCATCCCTGAATGTGC   | 480 |
| M              | CTGTGAGTGCTACTCTGCATACACCGGCCCAATTGTGACAAACCCATCCCTGAATGTGC   | 480 |
|                | *****                                                         |     |
| XM_031462916.1 | AACCTTGCTCTGCCCAGA498                                         |     |
| H              | AACCTTGCTCTGCCCAGA498                                         |     |
| M              | AACCTTGCTCTGCCCAGA498                                         |     |
|                | *****                                                         |     |

**Figure S4.** Analysis of nitrogenous bases matching for DNA in healthy and mastitis affected camels using GenBank gb|XM\_031462916.1| and STAB2 marker (498-bp) sequences.

|                |                                                               |     |
|----------------|---------------------------------------------------------------|-----|
| XM_010975501.1 | CGGCACGACTAATCATGTGTGCCTACTTCACCTTGTCCCTGCTTCCATCGCTCCTTCTCC  | 60  |
| H              | CGGCACGACTAATCATGTGTGCCTACTTCACCTTGTCCCTGCTTCCATCGCTCCTTCTCC  | 60  |
| M              | CGGCACGACTAATCATGTGTGCCTACTTCACCTTGTCCCTGCTTCCATCGCTCCTTCTCC  | 60  |
|                | *****                                                         |     |
| XM_010975501.1 | TCCTCCTGATTGTGGTGACAGCATCTTGACAGAAACAGAAACTGTGAGAATGTCCAAA    | 120 |
| H              | TCCTCCTGATTGTGGTGACAGCATCTTGACAGAAACAGAAACTGTGAGAATGTCCAAA    | 120 |
| M              | TCCTCCTGATTGTGGTGACAGCATCTTGACAGAAACAGAAACTGTGAGAATGTCCAAA    | 120 |
|                | *****                                                         |     |
| XM_010975501.1 | AGACTTGCCCTGTGATTGCCTGTGGTTCTCCAGGCATCAGCAGCTTCCCAGGCAAAGATG  | 180 |
| H              | AGACTTGCCCTGTGATTGCCTGTAGTTCTCCAGGCATCAGCAGCTTCCCAGGCAAAGATG  | 180 |
| M              | AGACTTGCCCTGTGATTGCCTGTGGTTCTCCAGGCATCAGCAGCTTCCCAGGCAAAGATG  | 180 |
|                | *****                                                         |     |
| XM_010975501.1 | GGCATGATGGTGCCCAAGGAAGAAAAGGGAGAACCAGGCCAAGGACTCAGAGGCTTGCAAG | 240 |
| H              | GGCATGATGGTGCCCAAGGAAGAAAAGGGAGAACCAGGCCAAGGACTCAGAGGCTTGCAAG | 240 |
| M              | GGCATGATGGTGCCCAAGGAAGAAAAGGGAGAACCAGGCCAAGGACTCAGAGGCTTGCAAG | 240 |
|                | *****                                                         |     |
| XM_010975501.1 | GCCCTCCTGGAAGGCAGGGCCTCAAGGAATCCCAGGGACTCCTGGGTTACCAGGACCAG   | 300 |
| H              | GCCCTCCTGGAAGGCAGGGCCTCAAGGAATCCCAGGGACTCCTGGGTTACCAGGACCAG   | 300 |
| M              | GCCCTCCTGGAAGGCAGGGCCTCAAGGAATCCCAGGGACTCCTGGGTTACCAGGACCAG   | 300 |
|                | *****                                                         |     |
| XM_010975501.1 | TGGGCCAAAAGGAGACCCTGGAGATGATTGGTTGACCATATTACCCTGGCTGCTTCAG    | 360 |
| H              | TGGGCCAAAAGGAGACCCTGGAGATGATTGGTTGACCATATTACCCTGGCTGCTTCAG    | 360 |
| M              | TGGGCCAAAAGGAGACCCTGGAGATGATTGGTTGACCATATTACCCTGGCTGCTTCAG    | 360 |
|                | *****                                                         |     |
| XM_010975501.1 | AAAGAGCAGCCCTGCGATCAGAATTGGAC                                 | 389 |
| H              | AAAGAGCAGCCCTGCGATCAGAATTGGAC                                 | 389 |
| M              | AAAGAGCAGCCCTGCGATCAGAATTGGAC                                 | 389 |
|                | *****                                                         |     |

**Figure S5.** Analysis of nitrogenous bases matching for DNA in healthy and mastitis affected camels using GenBank gb|XM\_010975501.1| and *MBL2* marker (389-bp) sequences.

|                |                                                              |     |
|----------------|--------------------------------------------------------------|-----|
| XM_031439680.1 | AGACTCTCCTCGTGGTGGTCCAGCCCGTGGGCATCGTATCGGAGGAGAACTTCTTCCGCA | 60  |
| H              | AGACTCTCCTCGTGGTGGTCCAGCCCGTGGGCATCGTATCGGAGGAGAACTTCTTCCGCA | 60  |
| M              | AGACTCTCCTCGTGGTGGTCCAGCCCGTGGGCATCGTATCGGAGGAGAACTTCTTCCGCA | 60  |
|                | *****                                                        |     |
| XM_031439680.1 | TCTACAAGCGGATCTCCTCCGTGAGCCAGGTGAGCGTGCGCGACTCCCAGCGGGTGCTCT | 120 |
| H              | TCTACAAGCGGATCTCCTCCGTGAGCCAGGTGAGCGTGCGCGACTCCCAGCGGGTGCTCT | 120 |
| M              | TCTACAAGCGGATCTCCTCCGTGAGCCAGGTGAGCGTGCGCGACTCCCAGCGGGTGCTCT | 120 |
|                | *****                                                        |     |
| XM_031439680.1 | ACATCCGCTACCGGCACCACTACCCGCCCGAGAACAACGAGTGGGGCGACTTCCAGACCC | 180 |
| H              | ACATCCGCTACCGGCACCACTACCCGCCCGAGAACAACGAGTGGGGCGACTTCCAGACCC | 180 |
| M              | ACATCCGCTACCGGCACCACTACCCGCCCGAGAACAACGAGTGGGGCGACTTCCAGACCC | 180 |
|                | *****                                                        |     |
| XM_031439680.1 | ACCGCAAGGTCGTGGGCCTCGTCACCATCACCGACTGCTTCTCGGCCAAGGACTGGCCGC | 240 |
| H              | ACCGCAAGGTCGTGGGCCTCGTCACCATCACCGACTGCTTCTCGGCCAAGGACTGGCCGC | 240 |
| M              | ACCGCAAGGTCGTGGGCCTCGTCACCATCACCGACTGCTTCTCGGCCAAGGACTGGCCGC | 240 |
|                | *****                                                        |     |
| XM_031439680.1 | AGACCTTTGAGAAGTTCCACGTGCAGAAGGAGCTGTATGGCGCCACGCTGTACGACTCGC | 300 |
| H              | AGACCTTTGAGAAGTTCCACGTGCAGAAGGAGCTGTATGGCGCCACGCTGTACGACTCGC | 300 |
| M              | AGACCTTTGAGAAGTTCCACGTGCAGAAGGAGCTGTATGGCGCCACGCTGTACGACTCGC | 300 |
|                | *****                                                        |     |
| XM_031439680.1 | GGCTCTTCGTCTTCGGGCTGCAGGGCGAGATCGCCGAGCAGCCGCGCACCGACGTGGCCT | 360 |
| H              | GGCTCTTCGTCTTCGGGCTGCAGGGCGAGATCGCCGAGCAGCCGCGCACCGACGTGGCCT | 360 |
| M              | GGCTCTTCGTCTTCGGGCTGCAGGGCGAGATCGCCGAGCAGCCGCGCACCGACGTGGCCT | 360 |
|                | *****                                                        |     |
| XM_031439680.1 | TCTACCCAGCTACGAGGACTGCGGGACGGTGGAGAAGAGGATCGAGGACTTCATCGAGT  | 420 |
| H              | TCTACCCAGCTACGAGGACTGCGGGACGGTGGAGAAGAGGATCGAGGACTTCATCGAGT  | 420 |
| M              | TCTACCCAGCTACGAGGACTGCGGGACGGTGGAGAAGAGGATCGAGGACTTCATCGAGT  | 420 |
|                | *****                                                        |     |
| XM_031439680.1 | CGC                                                          | 423 |
| H              | CGC                                                          | 423 |
| M              | CGC                                                          | 423 |
|                | ***                                                          |     |

**Figure S6.** Analysis of nitrogenous bases matching for DNA in healthy and mastitis affected camels using GenBank gb|XM\_031439680.1| and *TRAPPC9* marker (423-bp) sequences.

|                |                                                               |     |
|----------------|---------------------------------------------------------------|-----|
| XM_031435000.1 | TCTGCAGAAGCCCAGGTTGCTCCTGTTTTCTCCTTCTGTGGTTACCTAGGGGTCCCCCT   | 60  |
| H              | TCTGCAGAAGCCCAGGTTGCTCCTGTTTTCTCCTTCTGTGGTTACCTAGGGGTCCCCCT   | 60  |
| M              | TCTGCAGAAGCCCAGGTTGCTCCTGTTTTCTCCTTCTGTGGTTACCTAGGGGTCCCCCT   | 60  |
|                | *****                                                         |     |
| XM_031435000.1 | GTCCGTGGTGGTGCAGCTCCAGGATGCTCCTCCCGGGCAGGTAGTGACAGGATCAGTGTT  | 120 |
| H              | GTCCGTGGTGGTGCAGCTCCAGGATGCTCCTCCCGGGCAGGTAGTGACAGGATCAGTGTT  | 120 |
| M              | GTCCGTGGTGGTGCAGCTCCAGGATGCTCCTCCCGGGCAGGTAGTGACAGGATCAGTGTT  | 120 |
|                | *****                                                         |     |
| XM_031435000.1 | CCTGAGAAACCCGTCCAACCATCGTCACCTCTGTTCTGCGGAGGTGGATTTCACCCCTCAA | 180 |
| H              | CCTGAGAAACCCGTCCAACCATCGTCACCTCTGTTCTGCGGAGGTGGATTTCACCCCTCAA | 180 |
| M              | CCTGAGAAACCCGTCCAACCATCGTCACCTCTGTTCTGCGGAGGTGGATTTCACCCCTCAA | 180 |
|                | *****                                                         |     |
| XM_031435000.1 | CTCAGAGAAAGACTTCATACTTCTCAGCCTCCCGATCTCCCTGAAGGATGCAAAGGACTG  | 240 |
| H              | CTCAGAGAAAGACTTCATACTTCTCAGCCTCCCGATCTCCCTGAAGGATGCAAAGGACTG  | 240 |
| M              | CTCAGAGAAAGACTTCATACTTCTCAGCCTCCCGATCTCCCTGAAGGATGCGAAGGACTG  | 240 |
|                | *****                                                         |     |
| XM_031435000.1 | TGGCCTCCATCTCCTCCGCAGAGCCCCGAGGTGCAGCTGGTGGTCCAGTCGTCATGGCT   | 300 |
| H              | TGGCCTCCATCTCCTCCGCAGAGCCCCGAGGTGCAGCTGGTGGTCCAGTCGTCATGGCT   | 300 |
| M              | TGGCCTCCATCTCCTCCGCAGAGCCCCGAGGTGCAGCTGGTGGTCCAGTCGTCATGGCT   | 300 |
|                | *****                                                         |     |
| XM_031435000.1 | GAAGAACTATCTGTCCAAGCAGACTGACAGGCAGGGTGTCAACCTGTTCTTCTCCTCTCG  | 360 |
| H              | GAAGAACTATCTGTCCAAGCAGACTGACAGGCAGGGTGTCAACCTGTTCTTCTCCTCTCG  | 360 |
| M              | GAAGAACTATCTGTCCAAGCAGACTGACAGGCAGGGTGTCAACCTGTTCTTCTCCTCTCG  | 360 |
|                | *****                                                         |     |
| XM_031435000.1 | CCGGGGCCACCTCTTTCTGCAGACTGACCAGCCCGTTTATAACCTGGCCAGCGCGTTTCG  | 420 |
| H              | CCGGGGACACCTCTTTCTGCAGACTGACCAGCCCGTTTATAACCTGGCCAGCGCGTTTCG  | 420 |
| M              | CCGGGGCCACCTCTTTCTGCAGACTGACCAGCCCGTTTATAACCTGGCCAGCGGGTTTCG  | 420 |
|                | ***** *****                                                   |     |
| XM_031435000.1 | GTACCGAGTCTTTGCTCTGGATCA                                      | 444 |
| H              | GTACCGAGTCTTTGCTCTGGATCA                                      | 444 |
| M              | GTACCGAGTCTTTGCTCTGGATCA                                      | 444 |
|                | *****                                                         |     |

**Figure S7.** Analysis of nitrogenous bases matching for DNA in healthy and mastitis affected camels using GenBank gb|XM\_031435000.1| and C4A marker (444-bp) sequences.

|                |                                                                |     |
|----------------|----------------------------------------------------------------|-----|
| XM_011000575.2 | CGGGATCCAGCCAGCGACCAGATGAAGCGCTGGAAGGAGCAGCGGGCCGCGCAGAAACCT   | 60  |
| H              | CGGGATCCAGCCAGCGACCAGATGAAGCGCTGGAAGGAGCAGCGGGCCGCGCAGAAACCT   | 60  |
| M              | CGGGATCCAGCCAGCGACCAGATGAAGCGCTGGAAGGAGCAGCGGGCCGCGCAGAAACCT   | 60  |
|                | *****                                                          |     |
| XM_011000575.2 | GATGTCTTGACCACCGGGGGCGGCAATCCAGTAGGAGACAACTCAATGTTATGACAGCA    | 120 |
| H              | GATGTCTTGACCACCGGGGGCGGCAATCCAGTAGGAGACAACTCAATGTTATGACAGCA    | 120 |
| M              | GATGTCTTGACCACCGGGGGCGGCAATCCAGTAGGAGACAACTCAATGTTATGACAGCA    | 120 |
|                | *****                                                          |     |
| XM_011000575.2 | GGGCCCCGCGGGCCCCCTCCTGGTTCAGGATGTGGTTTTCTACTGATGAAATGGCTCACTTC | 180 |
| H              | GGGCCCCGCGGGCCCCCTCCTGGTTCAGGATGTGGTTTTCTACTGATGAAATGGCTCACTTC | 180 |
| M              | GGGCCCCGCGGGCCCCCTCCTGGTTCAGGATGTGGTTTTCTACTGATGAAATGGCTCACTTC | 180 |
|                | *****                                                          |     |
| XM_011000575.2 | GACCGGGAGAGAAATTCCTGAGAGAGTTGTGCACGCTAAAGGAGCAGGGGCTTTTGGCTAC  | 240 |
| H              | GACCGGGAGAGAAATTCCTGAGAGAGTTGTGCACGCTAAAGGAGCAGGGGCTTTTGGCTAC  | 240 |
| M              | GACCGGGAGAGAAATTCCTGAGAGAGTTGTGCACGCTAAAGGAGCAGGGGCTTTTGGCTAC  | 240 |
|                | *****                                                          |     |
| XM_011000575.2 | TTTGAGGTCACACATGACATTACTAGATACTCGAAGGCGAAGGTGTTTGAGCACATTGGA   | 300 |
| H              | TTTGAGGTCACACATGACATTACTAGATACTCGAAGGCGAAGGTGTTTGAGCACATTGGA   | 300 |
| M              | TTTGAGGTCACACATGACATTACTAGATACTCGAAGGCGAAGGTGTTTGAGCACATTGGA   | 300 |
|                | *****                                                          |     |
| XM_011000575.2 | AAGAGGACGCCCAATTGCCGTTTCGCTTCTCCACTGTTGCTGGAGAATCAGGCTCACCTGAC | 360 |
| H              | AAGAGGACGCCCAATTGCCGTTTCGCTTCTCCACTGTTGCTGGAGAATCAGGCTCACCTGAC | 360 |
| M              | AAGAGGACGCCCAATTGCCGTTTCGCTTCTCCACTGTTGCTGGAGAATCAGGCTCACCTGAC | 360 |
|                | *****                                                          |     |
| XM_011000575.2 | ACCGTTCGTGACCCTCGTGGGTTTGCAGTGAAATTTTACACGGAGGATGGTAACTGGGAT   | 420 |
| H              | ACCGTTCGTGACCCTCGTGGGTTTGCAGTGAAATTTTACACGGAGGATGGTAACTGGGAT   | 420 |
| M              | ACCGTTCGTGACCCTCGTGGGTTTGCAGTGAAATTTTACACGGAGGATGGTAACTGGGAT   | 420 |
|                | *****                                                          |     |
| XM_011000575.2 | CTTACTGGAATAACACCCCCATTTTCTTCATCAGGGATGCCATGTTGTTTCCATCCTTT    | 480 |
| H              | CTTACTGGAATAACACCCCCATTTTCTTCATCAGGGATGCCATGTTGTTTCCATCCTTT    | 480 |
| M              | CTTACTGGAATAACACCCCCATTTTCTTCATCAGGGATGCCATGTTGTTTCCATCCTTT    | 480 |
|                | *****                                                          |     |
| XM_011000575.2 | ATCCACAGCCAAAAGAGAAACCTCAAACGCATCTAAAGGATCCAGATATGGTCTGGGAC    | 540 |
| H              | ATCCACAGCCAAAAGAGAAACCTCAAACGCATCTAAAGGATCCAGATATGGTCTGGGAC    | 540 |
| M              | ATCCACAGCCAAAAGAGAAACCTCAAACGCATCTAAAGGATCCAGATATGGTCTGGGAC    | 540 |
|                | *****                                                          |     |

**Figure S8.** Analysis of nitrogenous bases matching for DNA in healthy and mastitis affected camels using GenBank gb|XM\_011000575.2| and CAT marker (540-bp) sequences.



|                |                                                                |     |
|----------------|----------------------------------------------------------------|-----|
| XM_010963047.2 | TGCTCTGTGCCTACCTGCTCACGGCGACACACGCCTCGGAAGCCTGGACCAACCCAGACC   | 60  |
| H              | TGCTCTGTGCCTACCTGCTCACGGCGACACACGCCTCGGAAGCCTGGACCAACCCAGACC   | 60  |
| M              | TGCTCTGTGCCTACCTGCTCACGGCGACACACGCCTCGGACGCCTGGACCAACCCAGACC   | 60  |
|                | *****                                                          |     |
| XM_010963047.2 | CGCAGGACCCCGGCTTCGGCATGGAGGAGCAGATCCGCGACATGCACGCCAAGTGACGG    | 120 |
| H              | CGCAGGACCCCGGCTTCGGCATGGAGGAGCAGATCCGCGACATGCACGCCAAGTGACGG    | 120 |
| M              | CGCAGGACCCCGGCTTCGGCATGGAGGAGCAGATCCGCGACATGCACGCCAAGTGACGG    | 120 |
|                | *****                                                          |     |
| XM_010963047.2 | AGATCTGGCAGGAGATGAAGCAGCGGCGGGCGGCGAGTGGCCAAGATGCTGCGCTGCACG   | 180 |
| H              | AGATCTGGCAGGAGATGAAGCAGCGGCGGGCGGCGAGTGGCCAAGATGCTGCGCTGCACG   | 180 |
| M              | AGATCTGGCAGGAGATGAAGCAGCGGCGGGCGGCGAGTGGCCAAGATGCTGCGCTGCACG   | 180 |
|                | *****                                                          |     |
| XM_010963047.2 | CCGCCTGCCGCGTGCTGCCGTTCGGCCGCGCTGGCCGCGGCGCAGCCCCGGGTGAGGGGCC  | 240 |
| H              | CCGCCTGCCGCGTGCTGCCGTTCGGCCGCGCTGGCCGCGGCGCAGCCCCGGGTGAGGGGCC  | 240 |
| M              | CCGCCTGCCGCGTGCTGCCGTTCGGCCGCGCTGGCCGCGGCGCAGCCCCGGGTGAGGGGCC  | 240 |
|                | *****                                                          |     |
| XM_010963047.2 | TCGTGCTCTTCCGGCAGCTCCGGCCCGGCGCCCTGCTCGAGGCCTTCTTCCACCTGGAGG   | 300 |
| H              | TCGTGCTCTTCCGGCAGCTCCGGCCCGGCGCCCTGCTCGAGGCCTTCTTCCACCTGGAGG   | 300 |
| M              | TCGTGCTCTTCCGGCAGCTCCGGCCCGGCGCCCTGCTCGAGGCCTTCTTCCACCTGGAGG   | 300 |
|                | *****                                                          |     |
| XM_010963047.2 | GCTTCCCGACCGAGCCCAACGTACCCAGCCGCGCCATCCACGTGCACCAAGTTCGGGGACT  | 360 |
| H              | GCTTCCCGACCGAGCCCAACGTACCCAGCCGCGCCATCCACTTGCACCAAGTTCGGGGACT  | 360 |
| M              | GCTTCCCGACCGAGCCCAACGGCACCCAGCCGCGCCATCCACGTGCACCAAGTTCGGGGACT | 360 |
|                | *****                                                          |     |
| XM_010963047.2 | TGACCCAGGGCTGCGACACCACCGGGCCGCACTACAACCCGCTGGGGGTGCCGACCCGA    | 420 |
| H              | TGACCCAGGGCTGCGACACCACCGGGCCGCACTACAACCCGCTGGGGGTGCCGACCCGA    | 420 |
| M              | TGACCCAGGGCTGCGACACCACCGGGCCGCACTACAACCCGCTGGGGGTGCCGACCCGA    | 420 |
|                | *****                                                          |     |
| XM_010963047.2 | AGCACCCGGGCGACTTCGGCAACTTCGCCGTGCGCGAC                         | 458 |
| H              | AGCACCCGGGCGACTTCGGCAACTTCGCCGTGCGCGAC                         | 458 |
| M              | AGCACCCGGGCGACTTCGGCAACTTCGCCGTGCGCGAC                         | 458 |
|                | *****                                                          |     |

**Figure S9.** Analysis of nitrogenous bases matching for DNA in healthy and mastitis affected camels using GenBank gb| XM\_010963047.2| and *SOD3* marker (458-bp) sequences.

|                |                                                               |     |
|----------------|---------------------------------------------------------------|-----|
| XM_010984536.2 | TCGAGGCCAATACTACCGTGGGCGCATCCGCTTCCACGACTATCTGGGAGACTCATGGG   | 60  |
| H              | TCGAGGCCAATACTACCGTGGGCGCATCCGCTTCCACGACTATCTGGGAGACTCATGGG   | 60  |
| M              | TCGAGGCCAATACTACCGTGGGCGCATCCGCTTCCACGACTATCTGGGAGACTCATGGG   | 60  |
|                | *****                                                         |     |
| XM_010984536.2 | GCATTCTCTTCTCCCAACCCTCGGGACTTTACCCAGTGTGTACCACGGAGCTTGGCAGAG  | 120 |
| H              | GCATTCTCTTCTCCCAACCCTCGGGACTTTACCCAGTGTGTACCACGGAGCTTGGCAGAG  | 120 |
| M              | GCATTCTCTTCTCCCAACCCTCGGGACTTTACCCAGTGTGTACCACGGAGCTTGGCAGAG  | 120 |
|                | *****                                                         |     |
| XM_010984536.2 | CAGCAAAGCTGGCACCAGAAATTTGCCAAGAGGAACGTGAAGATGATTGCCCTTTCAATAG | 180 |
| H              | CAGCAAAGCTGGCACCAGAAATTTGCCAAGAGGAACGTGAAGATGATTGCCCTTTCAATAG | 180 |
| M              | CAGCAAAGCTGGCACCAGAAATTTGCCAAGAGGAACGTGAAGATGATTGCCCTTTCAATAG | 180 |
|                | *****                                                         |     |
| XM_010984536.2 | ACAGTGTGGAAGACCATCTTGCTTGGAGCAAGGATATCAATGCTTACAATGGTAACGAGC  | 240 |
| H              | ACAGTGTGGAAGACCATCTTGCTTGGAGCAAGGATATCAATGCTTACAATGGTAACGAGC  | 240 |
| M              | ACAGTGTGGAAGACCATCTTGCTTGGAGCAAGGATATCAATGCTTACAATGGTAATGAGC  | 240 |
|                | *****                                                         |     |
| XM_010984536.2 | CCACGGAAAAGTTACCTTTTCCCATCATTGATGACAAGAATCGGGACCTTGCCATCCAGT  | 300 |
| H              | CCACGGAAAAGTTACCTTTTCCCATCATTGATGACAAGAATCGGGACCTTGCCATCCAGT  | 300 |
| M              | CCACGGAAAAGTTACCTTTTCCCATCATTGATGACAAGAATCGGGACCTTGCCATCCAGT  | 300 |
|                | *****                                                         |     |
| XM_010984536.2 | TGGGCATGCTGGACCCAGCAGAGAAGGACGAAAAGGGCATGCCTGTGACAGCTCGTGTGG  | 360 |
| H              | TGGGCATGCTGGACCCAGCAGAGAAGGACGAAAAGGGCATGCCTGTGACAGCTCGTGTGG  | 360 |
| M              | TGGGCATGCTGGACCCAGCAGAGAAGGACGAAAAGGGCATGCCTGTGACAGCTCGTGTGG  | 360 |
|                | *****                                                         |     |
| XM_010984536.2 | TATTTATTTTGGTCCCTGATAAGAACTGAACTGTCCATCCTTTACCCAGCTACCACTG    | 420 |
| H              | TATTTATTTTGGTCCCTGATAAGAACTGAACTGTCCATCCTTTACCCAGCTACCACTG    | 420 |
| M              | TATTTATTTTGGTCCCTGATAAGAACTGAACTGTCCATCCTTTACCCAGCTACCACTG    | 420 |
|                | *****                                                         |     |
| XM_010984536.2 | GCAGGAACCTTTGATGAGATTCTCAGAGTTATTATCTCTCTCCAGCTGACAG          | 471 |
| H              | GCAGGAACCTTTGATGAGATTCTCAGAGTTATTATCTCTCTCCAGCTGACAG          | 471 |
| M              | GCAGGAACCTTTGATGAGATTCTCAGAGTTATTATCTCTCTCCAGCTGACAG          | 471 |
|                | *****                                                         |     |

**Figure S10.** Analysis of nitrogenous bases matching for DNA in healthy and mastitis affected camels using GenBank gb|XM\_010984536.2| and *PRDX6* marker (471-bp) sequences.

|                |                                                                |     |
|----------------|----------------------------------------------------------------|-----|
| XM_045509732.1 | CTGCATCTGTTGTTGTCATGTAGGAATAAGTCAAGAATTTTTCTCTTGTGTTAAATTTTGTA | 60  |
| H              | CTGCATCTGTTGTTGTCATGTAGGAATAAGTCAAGAATTTTTCTCTTGTGTTAAATTTTGTA | 60  |
| M              | CTGCATCTGTTGTTGTCATGTAGGAATAAGTCAAGAATTTTTCTCTTGTGTTAAATTTTGTA | 60  |
|                | *****                                                          |     |
| XM_045509732.1 | AGAATTAGAAATGCTTGTGTTTTATCTACCCATCTACTTATCTACTCATCTACATGTCTA   | 120 |
| H              | AGAATTAGAAATGCTTGTGTTTTATCTACCCATCTACTTATCTACTCATCTACATGTCTA   | 120 |
| M              | AGAATTAGAAATGCTTGTGTTTTATCTACCCATCTACTTATCTACTCATCTACATGTCTA   | 120 |
|                | *****                                                          |     |
| XM_045509732.1 | TCTTTAGGGAGTGGAGCAACAGCTGTGGTCCAAGCAGCATATTGTATCCCTAAAAAGGAG   | 180 |
| H              | TCTTTAGGGAGTGGAGCAACAGCTGTGGTCCAAGCAGCATATTGTATCCCTAAAAAGGAG   | 180 |
| M              | TCTTTAGGGAGTGGAGCAACAGCTGTGGTCCAAGCAGCATATTGTATCCCTAAAAAGGAG   | 180 |
|                | *****                                                          |     |
| XM_045509732.1 | AAAGTGGCAATCAAACGGATAAACCTCGAGAAATGTCAAAGTAGCATGGATGAACTCCTG   | 240 |
| H              | AAAGTGGCAATCAAACGGATAAACCTCGAGAAATGTCAAAGTAGCATGGATGAACTCCTG   | 240 |
| M              | AAAGTGGCGATCAAACGGATAAACCTCGAGAAATGTCAAAGTAGCATGGATGAACTCCTG   | 240 |
|                | *****                                                          |     |
| XM_045509732.1 | AAAGAAATTCAAGCCATGAGTCAGTGCCATCATCCCAATATTGTGTCTTACTACACATCT   | 300 |
| H              | AAAGAAATTCAAGCCATGAGTCAGTGCCATCATCCCAATATTGTGTCTTACTACACATCT   | 300 |
| M              | AAAGAAATTCAAGCCATGAGTCAGTGCCATCATCCCAATATTGTGTCTTACTACACATCT   | 300 |
|                | *****                                                          |     |
| XM_045509732.1 | TTTGTGGTAAAAGATGAGCTGTGGCTAGTCATGAAGCTGCTAAGTGGAGGTTCTGTTCTG   | 360 |
| H              | TTTGTGGTAAAAGATGAGCTGTGGCTAGTCATGAAGCTGCTAAGTGGAGGTTCTGTTCTG   | 360 |
| M              | TTTGTGGTAAAAGATGAGCTGTGGCTAGTCATGAAGCTGCTAAGTGGAGGTTCTGTTCTG   | 360 |
|                | *****                                                          |     |
| XM_045509732.1 | GATATTATTAAGCACATTGTGGCAAAGGGGGAACATAAAAGTGGAGTCCTAGATGAAGCT   | 420 |
| H              | GATATTATTAAGCACATTGTGGCAAAGGGGGAACATAAAAGTGGAGTCCTAGATGAAGCT   | 420 |
| M              | GATATTATTAAGCACATTGTGGCAAAGGGGGAACATAAAAGTGGAGTCCTAGATGAAGCT   | 420 |
|                | *****                                                          |     |

**Figure S11.** Analysis of nitrogenous bases matching for DNA in healthy and mastitis affected camels using GenBank gb|XM\_045509732.1| and *OXSRI* marker (420-bp) sequences.

|                |                                                               |     |
|----------------|---------------------------------------------------------------|-----|
| XM_031442846.1 | CGCCCGGTGCTTCGGGGTGCGGACCTCGCCGTCCGGGGAGAAGGTCACGCATACCGGCCA  | 60  |
| H              | CGCCCGGTGCTTCGGGGTGCGGACCTCGCCGTCCGGGGAGAAGGTCACGCATACCGGCCA  | 60  |
| M              | CGCCCGGTGCTTCGGGGTGCGGACCTCGCCGTCCGGGGAGAAGGTCACGCATACCGGCCA  | 60  |
|                | *****                                                         |     |
| XM_031442846.1 | GGTTTATGAGGATGAAGACTACAGAAAAGTTCGATTGTAGGTCGCCAGAAAGAGGTGAA   | 120 |
| H              | GGTTTATGAGGATGAAGACTACAGAAAAGTTCGATTGTAGGTCGCCAGAAAGAGGTAAA   | 120 |
| M              | GGTTTATGAGGATGAAGACTACAGAAAAGTTCGATTGTAGGTCGCCAGAAAGAGGTGAA   | 120 |
|                | ***** **                                                      |     |
| XM_031442846.1 | TGAGAACTTTGCCATCGATCTGATAGCAGAGCAGCCTGTGAGCGAAGTCGGGAGTCGAGT  | 180 |
| H              | TGAGAACTTTGCCATCGATCTGATAGCAGAGCAGCCTGTGAGCGAAGTCGGGAGTCGAGT  | 180 |
| M              | TGAGAACTTTGCCATCGATCTGATAGCAGAGCAGCCTGTGAGCGAAGTCGGGAGTCGAGT  | 180 |
|                | *****                                                         |     |
| XM_031442846.1 | CATATCGTGTGACGGCGGGCGGGGGCGCCCTGGGCCACCCGCGAGTCTACATAAACCTGGA | 240 |
| H              | CATATCGTGTGACGGCGGGCGGGGGCGCCCTGGGCCACCCGCGAGTCTACATAAACCTGGA | 240 |
| M              | CATATCGTGTGACGGCGGGCGGGGGCGCCCTGGGCCACCCGCGAGTCTACATAAACCTGGA | 240 |
|                | *****                                                         |     |
| XM_031442846.1 | CAAAGAAACAAAGACAGGGACGTGCGGCTACTGTGGCCTGCAGTTCAGACAGCACCACCA  | 300 |
| H              | CAAAGAAACAAAGACAGGGACGTGCGGCTACTGTGGCCTGCAGTTCAGACAGCACCACCA  | 300 |
| M              | CAAAGAAACAAAGACAGGGACGTGCGGCTACTGTGGCCTGCAGTTCAGACAGCACCACCA  | 300 |
|                | *****                                                         |     |
| XM_031442846.1 | CTA                                                           | 303 |
| H              | CTA                                                           | 303 |
| M              | CTA                                                           | 303 |
|                | ***                                                           |     |

**Figure S12.** Analysis of nitrogenous bases matching for DNA in healthy and mastitis affected camels using GenBank gb|XM\_031442846.1| and *NDUFS6* marker (303-bp) sequences.

|                |                                                                |     |
|----------------|----------------------------------------------------------------|-----|
| XM_031466025.1 | TCCTGAATCAGAGCCGACCTGCCGCTGAAACTTTTCATCCATACTTCTCTAAGGCCGCAAG  | 60  |
| H              | TCCTGAATCAGAGCCGACCTGCCGCTGAAACTTTTCATCCATACTTCTCTAAGGCCGCAAG  | 60  |
| M              | TCCTGAATCAGAGCCGACCTGCCGCTGAAACTTTTCATCCATACTTCTCTAAGGCCGCAAG  | 60  |
|                | *****                                                          |     |
| XM_031466025.1 | AAGAGAAATATCCTGTGGGACCGTGGCTGCTGGCCCTCTTTGTTTTGTTGCTGTGGCT     | 120 |
| H              | AAGAGAAATATCCTGTGGGACCGTGGCTGCTGGCCCTCTTTGTTTTGTTGCTGTGGCT     | 120 |
| M              | AAGAGAAATATCCTGTGGGACCGTGGCTGCTGGCCCTCTTTGTTTTGTTGCTGTGGCT     | 120 |
|                | *****                                                          |     |
| XM_031466025.1 | CAGGTCGACCGCATAAAACACTGGCCTTTCTGGAGAAACCCCTTCTGTTTCACCACGAAGG  | 180 |
| H              | CAGGTCGACCGCATAAAACACTGGCCTTTCTGGAGAAACCCCTTCTGTTTCACCACGAAGG  | 180 |
| M              | CAGGTCGACCGCATAAAACACTGGCCTTTCTGGAGAAACCCCTTCTGTTTCACCACGAAGG  | 180 |
|                | *****                                                          |     |
| XM_031466025.1 | AAAGACTGAGGACATGCCTCTGCTCTGGAACCTCCTGCCCTCAGGATCTGAGATGGACAATC | 240 |
| H              | AAAGACTGAGGACATGCCTCTGCTCTGGAACCTCCTGCCCTCAGGATCTGAGATGGACAATC | 240 |
| M              | AAAGACTGAGGACATGCCTCTGCTCTGGAACCTCCTGCCCTCAGGATCTGAGATGGACAATC | 240 |
|                | *****                                                          |     |
| XM_031466025.1 | TGGAAGATGTCTCATCAGCCGTTGGCTCCCTCAAGCTATCTTCCAGATCATTGAGGC      | 300 |
| H              | TGGAAGATGTCTCATCAGCCGTTGGCTCCCTCAAGCTATCTTCCAGATCATTGAGGC      | 300 |
| M              | TGGAAGATGTCTCATCAGCCATTTGGCTCCCTCAAGCTATCTTCCAGATCATTGAGGC     | 300 |
|                | *****                                                          |     |
| XM_031466025.1 | ATAAGGATGGGCATGTGAGCAGGTTTGACACGCCCCCTCCCGCTGGAGGGTGGAGGACC    | 360 |
| H              | ATAAGGATGGGCATGTGAGCAGGTTTGACACGCCCCCTCCCGCTGGAGGGTGGAGGACC    | 360 |
| M              | ATAAGGATGGGCATGTGAGCAGGTTTGACACGCCCCCTCCCGCTGGAGGGTGGAGGACC    | 360 |
|                | *****                                                          |     |
| XM_031466025.1 | ACTTCAGCTCTTA                                                  | 373 |
| H              | ACTTCAGCTCTTA                                                  | 373 |
| M              | ACTTCAGCTCTTA                                                  | 373 |
|                | *****                                                          |     |

**Figure S13.** Analysis of nitrogenous bases matching for DNA in healthy and mastitis affected camels using GenBank gb|XM\_031466025.1| and *SERP2* marker (373-bp) sequences.

|                |                                                               |     |
|----------------|---------------------------------------------------------------|-----|
| XM_010994738.2 | AGCCCTGAGTGCTGGCAACATCGACGACGCGTTACAGTGCTACTCAGAAGCCATTAAAGTT | 60  |
| H              | AGCCCTGAGTGCTGGCAACATCGACGACGCGTTACAGTGCTACTCAGAAGCCATTAAAGTT | 60  |
| M              | AGCCCTGAGTGCTGGCAACATCGACGACGCGTTACAGTGCTACTCAGAAGCCATTAAAGTT | 60  |
|                | *****                                                         |     |
| XM_010994738.2 | AGACCCCTCAGAACCATGTGCTCTACAGTAATCGCTCAGCTGCCTATGCCAAGAAAGGAGA | 120 |
| H              | AGACCCCTCAGAACCATGTGCTCTACAGTAATCGCTCAGCTGCCTATGCCAAGAAAGGAGA | 120 |
| M              | AGACCCCTCAGAACCATGTGCTCTACAGTAATCGCTCAGCTGCCTATGCCAAGAAAGGAGA | 120 |
|                | *****                                                         |     |
| XM_010994738.2 | CTACCAGAAGGCCTACGAGGATGCCTGTAAAACCGTTGACCTGAAGCCTGACTGGGGCAA  | 180 |
| H              | CTACCAGAAGGCCTACGAGGATGCCTGTAAAACCGTTGACCTGAAGCCTGACTGGGGCAA  | 180 |
| M              | CTACCAGAAGGCCTACGAGGATGCCTGTAAAACCGTTGACCTGAAGCCTGACTGGGGCAA  | 180 |
|                | *****                                                         |     |
| XM_010994738.2 | GGGCTATTTCGCGAAAAGCAGCAGCTCTTGAGTTCTTAAACCGATTGAAGAAGCCAAGAG  | 240 |
| H              | GGGCTATTTCGCGAAAAGCAGCAGCTCTTGAGTTCTTAAACCGATTGAAGAAGCCAAGAG  | 240 |
| M              | GGGCTATTTCGCGAAAAGCAGCAGCTCTTGAGTTCTTAAACCGATTGAAGAAGCCAAGAG  | 240 |
|                | *****                                                         |     |
| XM_010994738.2 | AACCTATGAGGAGGGTTTTAAACATGAAGCAAACAACCCCTCAGCTCAAAGAGGGTTTACA | 300 |
| H              | AACCTATGAGGAGGGTTTTAAACATGAAGCAAACAACCCCTCAGCTCAAAGAGGGTTTACA | 300 |
| M              | AACCTATGAGGAGGGTTTTAAACATGAAGCAAACAACCCCTCAGCTCAAAGAGGGTTTACA | 300 |
|                | *****                                                         |     |
| XM_010994738.2 | GAATATGGAGACCCGGTTGGCAGAGAGGAAATTCATGAACCCTTTCAACATGCCTAATCT  | 360 |
| H              | GAATATGGAGACCCGGTTGGCAGAGAGGAAATTCATGAACCCTTTCAACATGCCTAATCT  | 360 |
| M              | GAATATGGAGACCCGGTTGGCAGAGAGGAAATTCATGAACCCTTTCAACATGCCTAATCT  | 360 |
|                | *****                                                         |     |
| XM_010994738.2 | GTATCAGAAGTTGGAGAGTGATCCCAGGACAAAGACTCTGCTCGCTGACCCTACCTACCG  | 420 |
| H              | GTATCAGAAGTTGGAGAGTGATCCCAGGACAAAGACTCTGCTCGCTGACCCTACCTACCG  | 420 |
| M              | GTATCAGAAGTTGGAGAGTGATCCCAGGACAAAGACTCTGCTCGCTGACCCTACCTACCG  | 420 |
|                | *****                                                         |     |
| XM_010994738.2 | GGAGCTGATAGAGCAACTGCGA                                        | 442 |
| H              | GGAGCTGATAGAGCAACTGCGA                                        | 442 |
| M              | GGAGCTGATAGAGCAACTGCGA                                        | 442 |
|                | *****                                                         |     |

**Figure S14.** Analysis of nitrogenous bases matching for DNA in healthy and mastitis affected camels using GenBank gb|XM\_010994738.2| and *ST1P1* marker (442-bp) sequences.

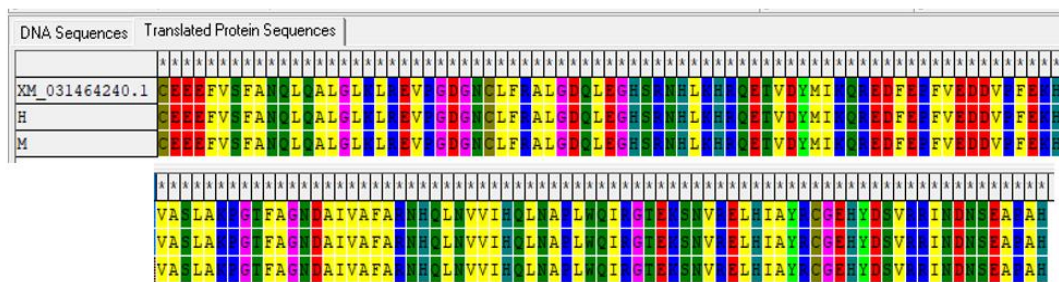

**Figure S15.** Analysis of amino acid matching in healthy and mastitis affected camels using GenBank gb|XM\_031464240.1| and *OTUD3* marker (452-bp).

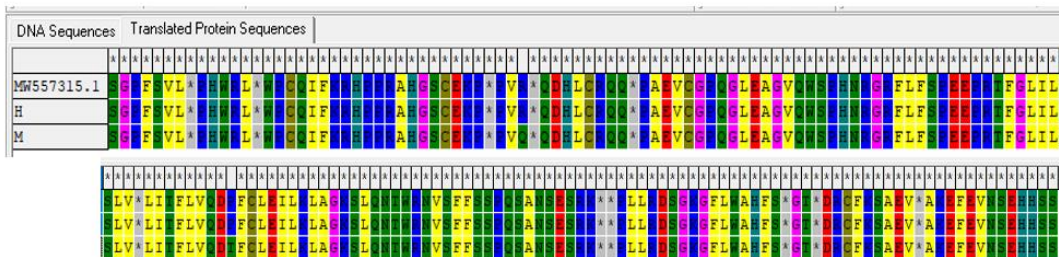

**Figure S16.** Analysis of amino acid matching in healthy and mastitis affected camels using GenBank gb|MW557315.1| and *TLR2* marker (540-bp).

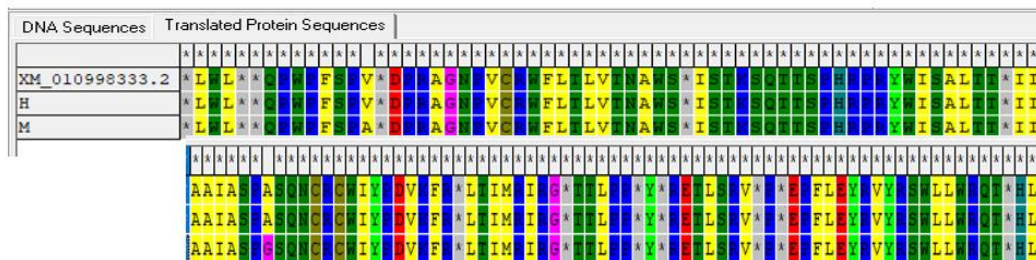

**Figure S17.** Analysis of amino acid matching in healthy and mastitis affected camels using GenBank gb|XM\_010998333.2| and *TLR4* marker (405-bp).

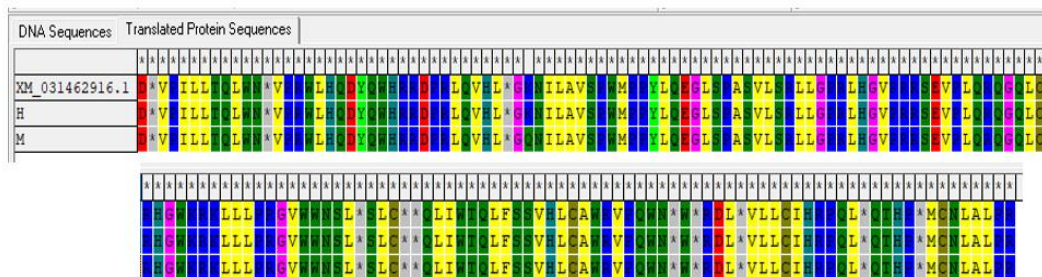

**Figure S18.** Analysis of amino acid matching in healthy and mastitis affected camels using GenBank gb|XM\_031462916.1| and *STAB2* marker (498-bp).



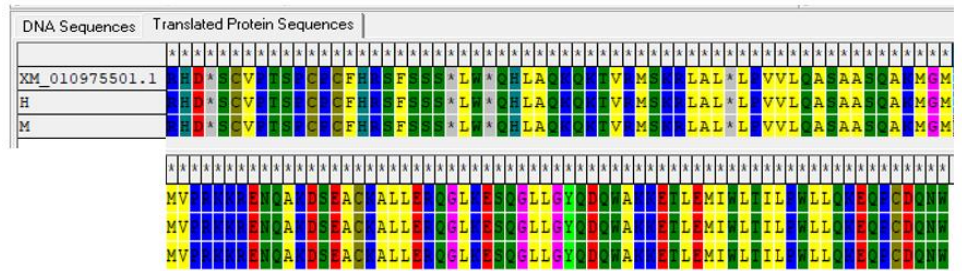

**Figure S19.** Analysis of amino acid matching in healthy and mastitis affected camels using GenBank gb|XM\_010975501.1| and *MBL2* marker (389-bp).

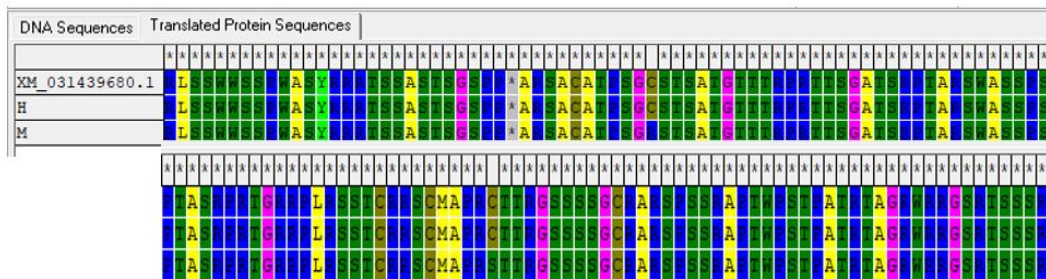

**Figure S20.** Analysis of amino acid matching in healthy and mastitis affected camels using GenBank gb|XM\_031439680.1| and *TRAPPC9* marker (423-bp).

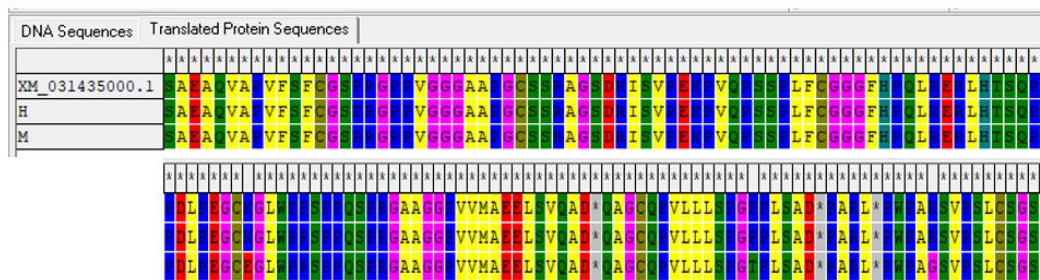

**Figure S21.** Analysis of amino acid matching in healthy and mastitis affected camels using GenBank gb|XM\_031435000.1| and *C4A* marker (444-bp).

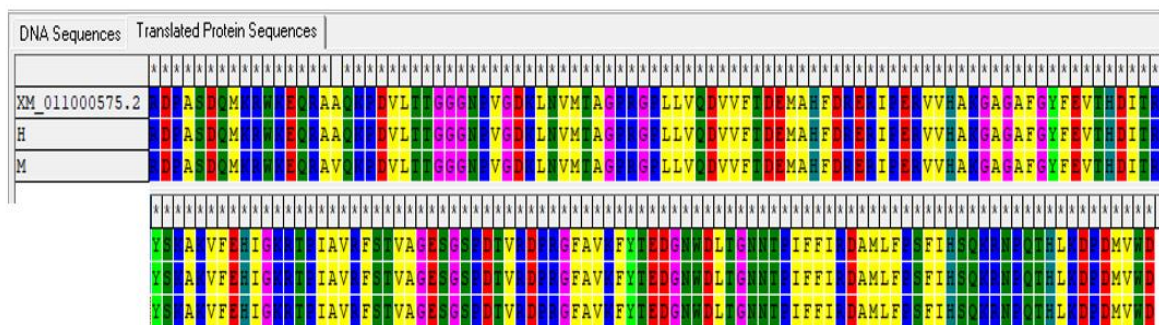

**Figure S22.** Analysis of amino acid matching in healthy and mastitis affected camels using GenBank gb|XM\_011000575.2| and *CAT* marker (540-bp).





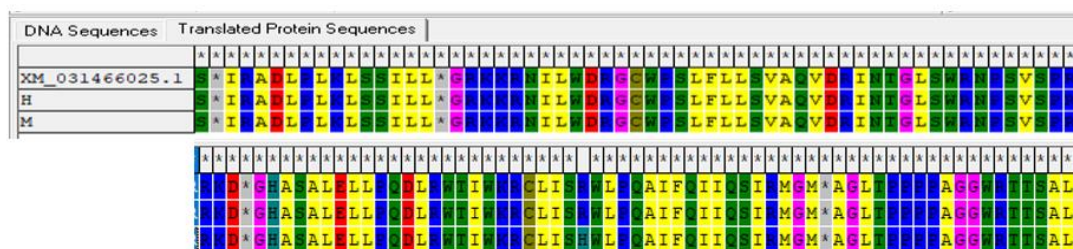

**Figure S27.** Analysis of amino acid matching in healthy and mastitis affected camels using GenBank gb|XM\_031466025.1| and *SERP2* marker (373-bp).

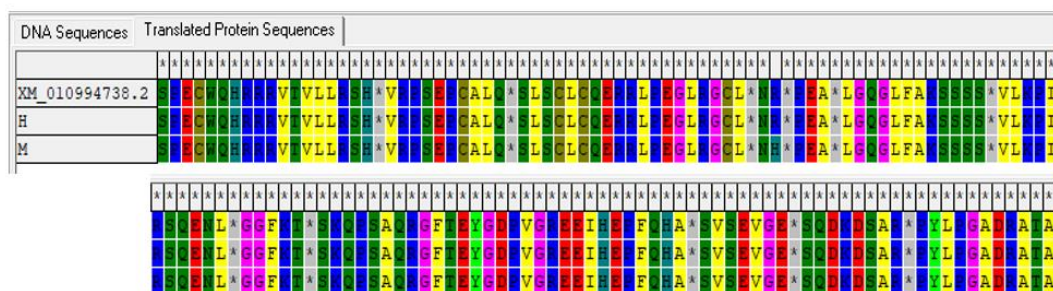

**Figure S28.** Analysis of amino acid matching in healthy and mastitis affected camels using GenBank gb|XM\_010994738.2| and *ST1P1* marker (442-bp).
